# Supplementary material for: The Association of IgE Levels with ADAM33 Genetic Polymorphisms among Asthmatic Patients
Source: MDPI journal article supplement (doi:10.3390/jpm11050329), 2021-04-22
Supplement: s1 [file s1]

Supplementary Table S1. The demographic data of allergic rhinitis patients

| Phenotype         | Sample size | % female | % male | Av. age $\pm$ SD  |
|-------------------|-------------|----------|--------|-------------------|
| Allergic rhinitis | 95          | 62       | 38     | 30.91 $\pm$ 15.41 |

Supplementary Table S2. The allele and genotype frequency of *ADAM33* genetic variants among allergic rhinitis patients

|     | Model                    | Genotype | Allergic rhinitis (n=95)<br>IgE levels: IU/ml (n) | Genotype comparison<br>(P-value) |
|-----|--------------------------|----------|---------------------------------------------------|----------------------------------|
| T1  | Co-dominant              | AA       | 71.1 $\pm$ 5.1 (51)                               | AA <i>vs</i> AG (0.8648)         |
|     |                          | AG       | 117.9 $\pm$ 3.1 (40)                              | AA <i>vs</i> GG (0.0002)         |
|     |                          | GG       | 25.1 $\pm$ 8.4 (4)                                | AG <i>vs</i> GG (0.0014)         |
|     | Dominant                 | AA       |                                                   | (0.9587)                         |
|     |                          | AG+GG    |                                                   |                                  |
|     | Recessive                | AA+AG    |                                                   | (<0.0001)                        |
|     |                          | GG       |                                                   |                                  |
|     | Variant allele frequency |          | 0.25                                              |                                  |
| T2  | Co-dominant              | GG       | 73.1 $\pm$ 5.6 (49)                               | GG <i>vs</i> GA (0.9757)         |
|     |                          | GA       | 113.3 $\pm$ 9.8 (42)                              | GG <i>vs</i> AA (0.0002)         |
|     |                          | AA       | 25.1 $\pm$ 8.4 (4)                                | GA <i>vs</i> AA (0.001)          |
|     | Dominant                 | GG       |                                                   | (0.8098)                         |
|     |                          | GA+AA    |                                                   |                                  |
|     | Recessive                | GG+GA    |                                                   | (<0.0001)                        |
|     |                          | AA       |                                                   |                                  |
|     | Variant allele frequency |          | 0.26                                              |                                  |
| T+1 | Co-dominant              | GG       | 71.1 $\pm$ 5.1 (51)                               | GG <i>vs</i> GA (0.8648)         |
|     |                          | GA       | 117.9 $\pm$ 3.1 (40)                              | GG <i>vs</i> AA (0.0002)         |
|     |                          | AA       | 25.1 $\pm$ 8.4 (4)                                | GA <i>vs</i> AA (0.0014)         |
|     | Dominant                 | GG       |                                                   | (0.9587)                         |
|     |                          | GA+AA    |                                                   |                                  |
|     | Recessive                | GG+GA    |                                                   | (<0.0001)                        |
|     |                          | AA       |                                                   |                                  |
|     | Variant allele frequency |          | 0.25                                              |                                  |
| V4  | Co-dominant              | CC       | 106.8 $\pm$ 4.8 (56)                              | CC <i>vs</i> CG (0.0035)         |
|     |                          | CG       | 64.7 $\pm$ 2.8 (36)                               | CC <i>vs</i> GG (0.0685)         |
|     |                          | GG       | 43.1 $\pm$ 9.7 (3)                                | CG <i>vs</i> GG (0.7016)         |
|     | Dominant                 | CC       |                                                   | (0.0039)                         |
|     |                          | CG+GG    |                                                   |                                  |
|     | Recessive                | CC+CG    |                                                   | (0.0164)                         |
|     |                          | GG       |                                                   |                                  |
|     | Variant allele frequency |          | 0.22                                              |                                  |
| S1  | Co-dominant              | GG       | 86.3 $\pm$ 7.2 (84)                               | GG <i>vs</i> GA (<0.0001)        |

|                          |             |       |                |                          |
|--------------------------|-------------|-------|----------------|--------------------------|
|                          |             | GA    | 108±7.5 (11)   |                          |
|                          |             | AA    | None           |                          |
|                          | Dominant    | GG    | N/A            |                          |
|                          |             | GA+AA |                |                          |
|                          | Recessive   | GG+GA | N/A            |                          |
|                          |             | AA    |                |                          |
| Variant allele frequency |             |       | 0.06           |                          |
| S2                       | Co-dominant | CC    | 44.9±1.5 (25)  | CC <i>vs</i> CG (0.0999) |
|                          |             | CG    | 110.7±4.5 (52) | CC <i>vs</i> GG (0.3291) |
|                          |             | GG    | 86.9±7.3 (18)  | CG <i>vs</i> GG (0.8681) |
|                          | Dominant    | CC    |                | (0.0548)                 |
|                          |             | CG+GG |                |                          |
|                          | Recessive   | CC+CG |                | (0.4979)                 |
|                          |             | GG    |                |                          |
| Variant allele frequency |             |       | 0.46           |                          |
| Q-1                      | Co-dominant | TT    | 80.5±8.6 (62)  | TT <i>vs</i> TC (0.0451) |
|                          |             | TC    | 115±5.0 (26)   | TT <i>vs</i> CC (0.0062) |
|                          |             | CC    | 62.1±2.5 (7)   | TC <i>vs</i> CC (0.3635) |
|                          | Dominant    | TT    |                | (0.0685)                 |
|                          |             | CT+CC |                |                          |
|                          | Recessive   | TT+CT |                | (0.008)                  |
|                          |             | CC    |                |                          |
| Variant allele frequency |             |       | 0.21           |                          |

Supplementary Table S3. The association of *ADAM33* genetic variants with the IgE levels among allergic rhinitis patients

| Genotype     | IgE level<br>(average ± SE) |             |             |             |             |             |             |             |
|--------------|-----------------------------|-------------|-------------|-------------|-------------|-------------|-------------|-------------|
|              | T1                          | T2          | T+1         | V4          | S1          | S2          | F+1         | Q-1         |
| Wild         | 16.18±17.91                 | 16.54±18.02 | 16.94±18.62 | 21.35±26.10 | 21.08±24.81 | 17.54±19.57 | 19.37±20.91 | 20.61±24.52 |
| Heterozygous | 32.11±33.29                 | 30.34±33.01 | 30.21±33.17 | 17.06±19.46 | 12.53±13.48 | 21.22±26.95 | 18.90±25.03 | 19.73±23.19 |
| Homozygous   | 6.40±4.60                   | 6.40±4.62   | 6.40±4.61   | 20.24±24.03 | -           | 27.30±29.25 | 27.33±30.45 | 3.72        |
| P value      | 0.003*                      | 0.01*       | 0.02*       | 0.73        | 0.26        | 0.38        | 0.47        | 0.78        |

"\*" Statistical significance using X<sup>2</sup> test
